# Supplementary material for: Choline Attenuates Cardiac Fibrosis by Inhibiting p38MAPK Signaling Possibly by Acting on M3 Muscarinic Acetylcholine Receptor
Source: PubMed Central journal article supplement (PMC6900736; doi:10.3389/fphar.2019.01386), 2019-11-21
Supplement: Image_1.pdf [file Image_1.pdf]

## Supplemental data

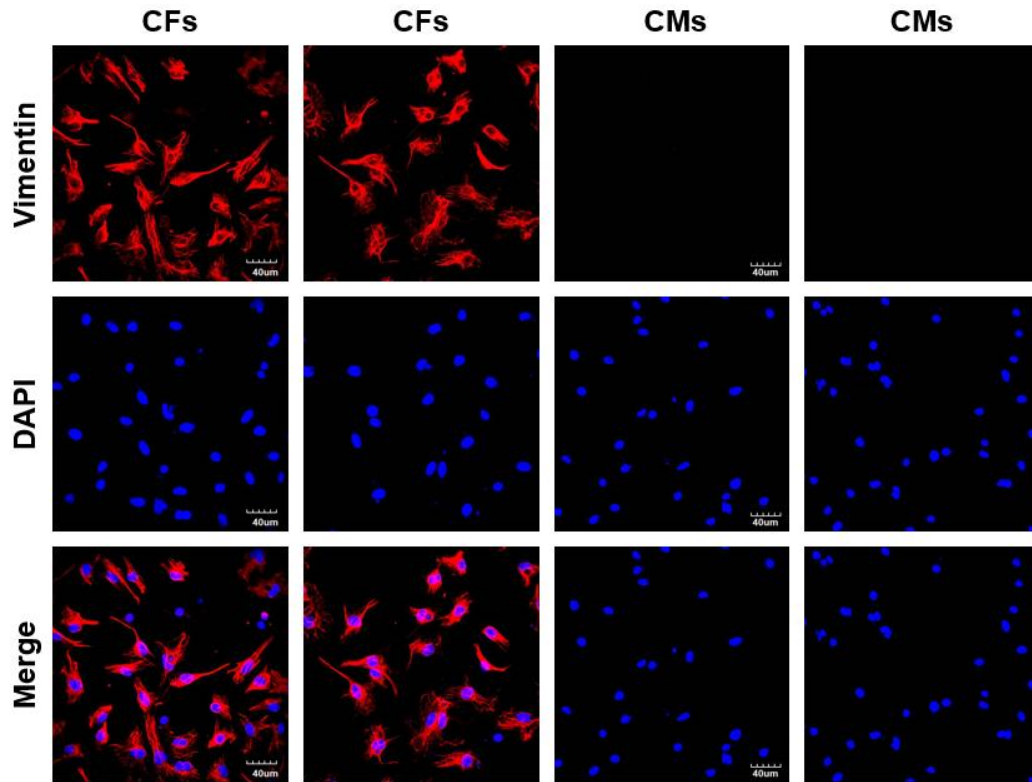

**Fig. S1** Immunofluorescence detection of Vimentin in cardiomyocytes (CM) and cardiac fibroblasts (CF). Red color indicates Vimentin, blue color (DAPI) indicates nucleus.
